# Supplementary material for: Synthesis of gold(iii) ← gold(i)–NHC through disproportionation: the role of gold(i)–NHC in the induction of apoptosis in HepG2 cells
Source: Royal Society of Chemistry journal article supplement (doi:10.1039/c5nj02979a), 2016-01-01
Supplement: c5nj02979a1.pdf [file c5nj02979a1.pdf]

Abhishek Nandy <sup>a</sup>, Tapastaru Samanta,<sup>b</sup> Sumana Mallick, <sup>a</sup> Partha Mitra,<sup>c</sup> Saikat Kumar Seth, <sup>d</sup> Krishna Das Saha<sup>a\*</sup>, Salem S. Al-Deyab <sup>e</sup> and Joydev Dinda<sup>f\*</sup>

#### Notes and references

<sup>a</sup> Cancer Biology and Inflammatory Disorder Division, Indian Institute of Chemical Biology, Kolkata-700032, India

<sup>b</sup> School of Applied Science, Haldia Institute of Technology, Haldia-721657, Purba Medinipur, West Bengal, India

<sup>c</sup> Department of Inorganic Chemistry, Indian Association for the Cultivation of Sciences, Jadavpur, Kolkata-700032, West Bengal, India

<sup>d</sup> Department of Physics, Jadavpu University, Jadavpur, Kolkata-700032, West Bengal, India

<sup>e</sup>Chemistry Department, College of Science, King Saud University, B.O. Box 2455, Riyadh, 11451, Saudi Arabia

<sup>f</sup> Department of Chemistry, Utkal University, Bhubaneswar-751004, Odisha., India.

#### Corresponding Authors

Prof. Joydev Dinda

e.mail: [joydevdinda@gmail.com](mailto:joydevdinda@gmail.com) , [dindajoy@yahoo.com](mailto:dindajoy@yahoo.com)

A.

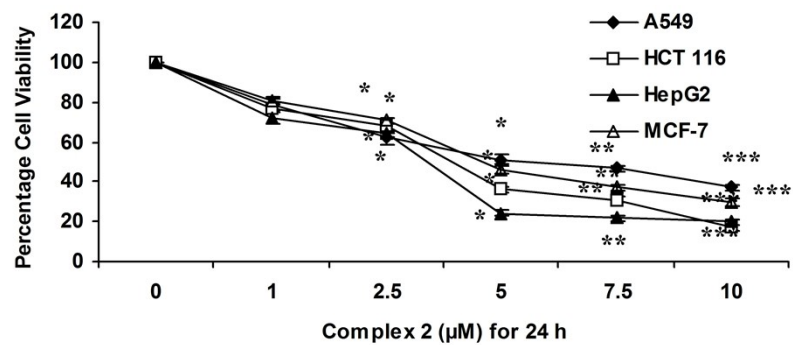

B.

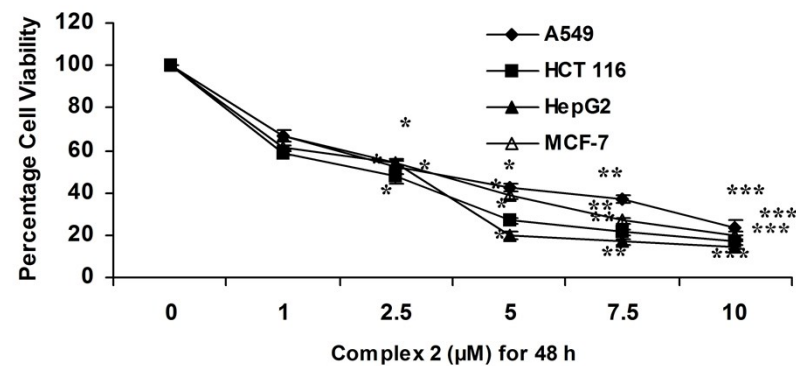

C.

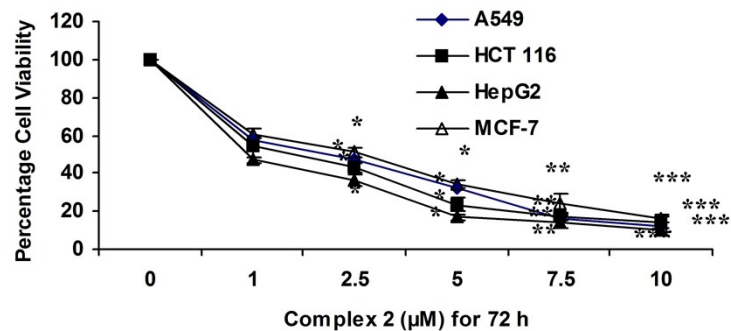

Fig.S1. All the experiments were carried out in triplicate and values were reported as mean  $\pm$  SD. Student's t test was used for determining statistical significance (\*P<0.05, \*\*P<0.01 and \*\*\*P<0.001).

A.

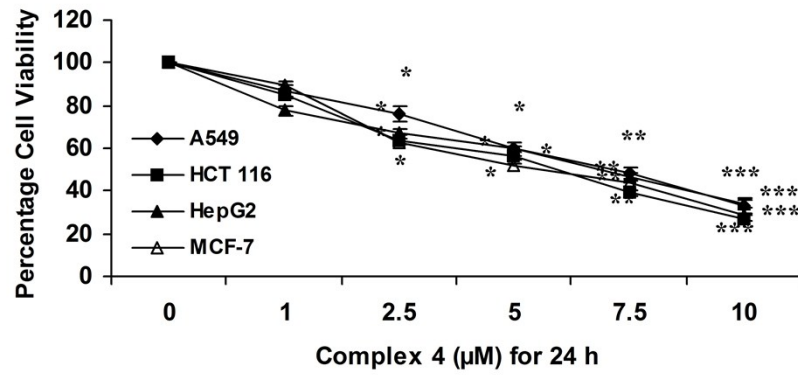

B.

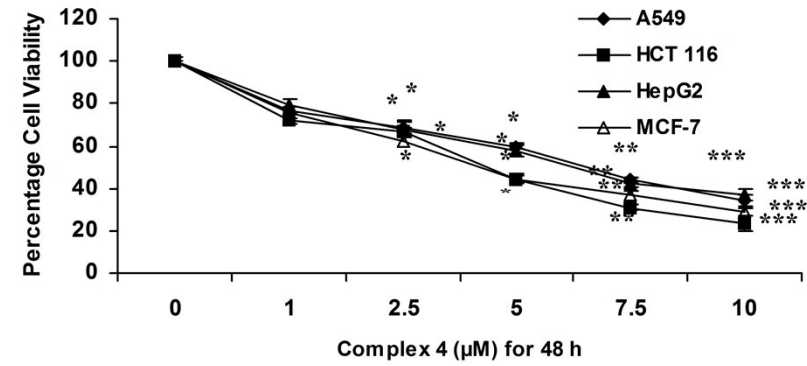

C.

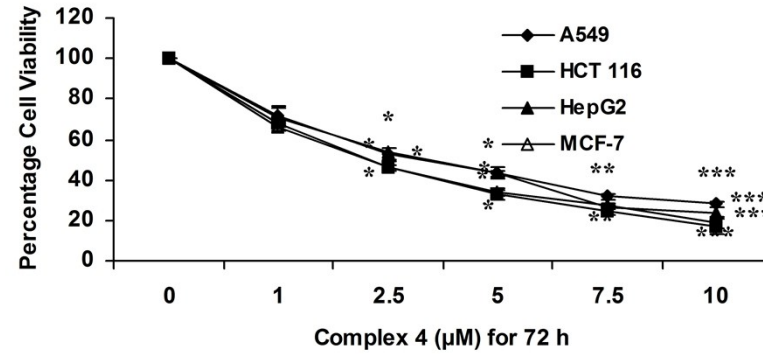

Fig. S2. All the experiments were carried out in triplicate and values were reported as mean  $\pm$  SD. Student's t test was used for determining statistical significance (\* $P < 0.05$ , \*\* $P < 0.01$  and \*\*\* $P < 0.001$ ).
